# Supplementary material
Source: publisher figshare collection journal article supplement (https://karger.figshare.com/ndownloader/files/26687705)
Supplement: Supplementary file 1 [file 26687705]

# Supplemental File

Table S1. Odds ratio (OR) and 95% confidence interval (CI) for the association of serum phosphorus with the occurrence of intradialytic hypotension at a different time period (the third week of the study month) in 173 maintenance hemodialysis patients.

|  | Per 1mg/dL increment in serum phosphorus level | | |
| --- | --- | --- | --- |
|  | OR | 95% CI | P value |
| Model 1 | 1.43 | 1.10–1.85 | 0.008 |
| Model 2 | 1.70 | 1.22–2.39 | 0.002 |
| Model 3 | 1.81 | 1.25–2.61 | 0.002 |
| Model 4 | 1.79 | 1.22–2.64 | 0.003 |

Model 1: unadjusted. Model 2: adjusted for age, sex, dialysis vintage, diabetes, hypertension, heart failure, and coronary artery disease. Model 3: further adjusted for pre-dialysis systolic blood pressure, pre-diastolic blood pressure, renin angiotensin system antagonists, beta blockers, calcium channel blockers, and vitamin D receptor agonist. Model 4(fully adjusted model): further adjusted for serum hemoglobin, albumin, calcium, intact parathyroid hormone, and ultrafiltration rate.

Table S2. Odds ratio (OR) and 95% confidence interval (CI) for the association of categorized serum phosphorus groups with the occurrence of intradialytic hypotension at a different time period (the third week of the study month) in 173 maintenance hemodialysis patients

| Serum phosphorus, mg/dL | Model 1 | Model 2 | Model 3 | Model 4 |
| --- | --- | --- | --- | --- |
| Tertile 1 | 0.87 (0.25–3.02) | 0.79 (0.21–2.92) | 0.78 (0.20–3.10) | 0.81 (0.20–3.31) |
| Tertile 2 | Reference | Reference | Reference | Reference |
| Tertile 3 | 3.37 (1.21–9.35) | 4.22 (1.38–12.91) | 4.37 (1.35–14.16) | 3.81 (1.13–12.84) |

Model 1: unadjusted. Model 2: adjusted for age, sex, dialysis vintage, diabetes, hypertension, heart failure, and coronary artery disease. Model 3: further adjusted for pre-dialysis systolic blood pressure, pre-diastolic blood pressure, renin angiotensin system antagonists, beta blockers, calcium channel blockers, and vitamin D receptor agonist. Model 4(fully adjusted model): further adjusted for serum hemoglobin, albumin, calcium, intact parathyroid hormone, and ultrafiltration rate.
